# Supplementary material
Source: PubMed Central journal article supplement (PMC4978555)
Supplement: supp_the2015-0533_Supplemental_Appendix.pdf [file supp_the2015-0533_Supplemental_Appendix.pdf]

Supplemental Appendix for:  
A Randomized Controlled Trial of a Supportive Care Package (SurvivorCare) for Survivors of Colorectal Cancer  
Michael Jefford et al.

### APPENDIX S1

Compliance with assessments by study arm. Data are percentages for 110 usual care and 107 intervention participants.

*Attempted*

| Scale/item               | Baseline   |              | 8-weeks post-baseline |              | 6 months post-baseline |              |
|--------------------------|------------|--------------|-----------------------|--------------|------------------------|--------------|
|                          | Usual care | Intervention | Usual care            | Intervention | Usual care             | Intervention |
| <b>BSI</b>               | 100        | 99           | 97                    | 90           | 93                     | 88           |
| <b>CaSUN</b>             |            |              |                       |              |                        |              |
| Existential survivorship | 97         | 99           | 95                    | 90           | 92                     | 87           |
| Comprehensive care       | 99         | 98           | 95                    | 87           | 91                     | 88           |
| Information              | 98         | 99           | 95                    | 87           | 92                     | 88           |
| <b>QLQ-C30</b>           |            |              |                       |              |                        |              |
| Global health status     | 100        | 99           | 96                    | 89           | 92                     | 88           |
| Physical functioning     | 100        | 99           | 97                    | 90           | 93                     | 88           |
| Role functioning         | 100        | 99           | 97                    | 90           | 93                     | 88           |
| Emotional functioning    | 100        | 99           | 96                    | 89           | 92                     | 88           |
| Cognitive functioning    | 100        | 99           | 96                    | 89           | 92                     | 88           |
| Social functioning       | 100        | 99           | 96                    | 89           | 92                     | 88           |
| Fatigue                  | 100        | 99           | 97                    | 90           | 93                     | 88           |
| Nausea and vomiting      | 100        | 99           | 97                    | 90           | 93                     | 88           |
| Pain                     | 100        | 99           | 97                    | 90           | 93                     | 88           |
| Dyspnoea                 | 100        | 99           | 96                    | 89           | 93                     | 88           |
| Insomnia                 | 99         | 98           | 97                    | 89           | 91                     | 88           |
| Appetite loss            | 100        | 99           | 97                    | 90           | 92                     | 88           |
| Constipation             | 100        | 98           | 97                    | 90           | 93                     | 88           |
| Diarrhoea                | 99         | 99           | 97                    | 88           | 92                     | 88           |
| Financial difficulties   | 100        | 99           | 96                    | 89           | 92                     | 88           |
| <b>QLQ-CR29</b>          |            |              |                       |              |                        |              |
| Body image               | 100        | 99           | 96                    | 87           | 92                     | 88           |
| Anxiety                  | 99         | 99           | 96                    | 88           | 92                     | 87           |
| Weight                   | 100        | 99           | 96                    | 89           | 92                     | 88           |
| Sexual interest (men)    | 96         | 98           | 80                    | 89           | 82                     | 80           |
| Sexual interest (women)  | 87         | 90           | 88                    | 69           | 71                     | 73           |
| Urinary frequency        | 100        | 98           | 95                    | 88           | 92                     | 87           |
| Blood and mucus in stool | 97         | 98           | 95                    | 89           | 90                     | 88           |
| Stool frequency          | 95         | 93           | 91                    | 79           | 85                     | 80           |
| Urinary incontinence     | 100        | 99           | 95                    | 89           | 92                     | 87           |
| Dysuria                  | 100        | 99           | 96                    | 89           | 92                     | 87           |
| Abdominal pain           | 100        | 99           | 96                    | 89           | 92                     | 87           |
| Buttock pain             | 100        | 99           | 96                    | 89           | 92                     | 88           |
| Bloating                 | 100        | 99           | 96                    | 89           | 92                     | 88           |
| Dry mouth                | 100        | 99           | 96                    | 88           | 92                     | 88           |
| Hair loss                | 100        | 99           | 96                    | 88           | 92                     | 88           |

|                     |     |     |     |    |     |    |
|---------------------|-----|-----|-----|----|-----|----|
| Taste               | 100 | 98  | 96  | 88 | 91  | 88 |
| Flatulence          | 95  | 93  | 91  | 79 | 85  | 79 |
| Faecal incontinence | 95  | 93  | 89  | 79 | 85  | 79 |
| Sore skin           | 95  | 93  | 91  | 79 | 85  | 80 |
| Embarrassment       | 95  | 93  | 91  | 79 | 85  | 80 |
| Stoma care problems | 100 | 100 | 100 | 96 | 100 | 95 |
| Impotence           | 96  | 98  | 70  | 89 | 79  | 78 |
| Dyspareunia         | 70  | 73  | 62  | 56 | 58  | 60 |

## APPENDIX S2

Missing items for study measures. Data are percentages for all completed forms.

| Outcome measure | Baseline   |              | 6 weeks post-baseline |              | 6 months post-baseline |              |
|-----------------|------------|--------------|-----------------------|--------------|------------------------|--------------|
|                 | Usual care | Intervention | Usual care            | Intervention | Usual care             | Intervention |
| BSI             | 0          | 0.9          | 0.1                   | 0.3          | 0.1                    | 0.1          |
| CaSUN           | 2.8        | 1.7          | 2.8                   | 2.0          | 1.4                    | 0.8          |
| QLQ-C30         | 0.4        | 1.4          | 0.7                   | 0.9          | 0.7                    | 0.1          |
| QLQ-CR29        | 2.5        | 3.2          | 4.2                   | 4.9          | 4.4                    | 3.5          |
| Satisfaction    |            |              | 7.7                   | 4.9          |                        |              |

## APPENDIX S3

Descriptives for study outcomes assessed by single items. Data are means and standard deviations for study groups at scheduled assessments. These are provided for comparative purposes only, however, as most published studies have presented means and standard deviations.

The distribution of responses to these outcomes were highly skewed, so best summarised with medians and interquartile ranges. These are presented in the next table.

|                    | Baseline    |              | 8 weeks post-baseline |              | 6 months post-baseline |              |
|--------------------|-------------|--------------|-----------------------|--------------|------------------------|--------------|
|                    | Usual care  | Intervention | Usual care            | Intervention | Usual care             | Intervention |
| <b>QLQ-C30</b>     |             |              |                       |              |                        |              |
| Dyspnoea           | 13.6 (21.8) | 16.4 (24.9)  | 12.9 (18.7)           | 11.6 (18.0)  | 9.5 (16.5)             | 10.6 (17.1)  |
| Insomnia           | 29.7 (25.8) | 29.5 (28.6)  | 26.5 (27.4)           | 22.8 (25.4)  | 25.0 (27.8)            | 22.3 (26.0)  |
| Appetite loss      | 16.4 (23.8) | 17.9 (24.4)  | 8.7 (18.5)            | 9.0 (17.8)   | 6.3 (14.7)             | 7.1 (17.5)   |
| Constipation       | 18.2 (26.6) | 15.6 (24.5)  | 11.8 (20.6)           | 9.0 (18.4)   | 11.8 (19.1)            | 7.1 (16.1)   |
| Diarrhoea          | 21.7 (25.4) | 21.4 (24.4)  | 17.1 (23.1)           | 18.4 (21.1)  | 16.2 (22.4)            | 17.7 (22.2)  |
| Financial problems | 16.4 (26.2) | 22.3 (27.9)  | 17.3 (25.7)           | 18.9 (25.6)  | 15.5 (28.1)            | 16.7 (24.3)  |
| <b>QLQ-CR29</b>    |             |              |                       |              |                        |              |
| <b>Urinary</b>     |             |              |                       |              |                        |              |
| incontinence       | 9.4 (18.1)  | 8.2 (15.8)   | 10.5 (19.8)           | 8.4 (17.5)   | 12.9 (20.5)            | 10.0 (16.9)  |
| Dysuria            | 1.8 (8.8)   | 2.5 (11.9)   | 2.2 (11.5)            | 3.5 (11.4)   | 2.6 (12.2)             | 2.2 (9.6)    |
| Abdominal pain     | 12.7 (19.7) | 12.3 (22.7)  | 10.7 (15.6)           | 8.1 (17.3)   | 12.9 (18.8)            | 8.6 (19.6)   |
| Buttock pain       | 12.7 (24.7) | 10.4 (20.8)  | 12.3 (20.7)           | 10.5 (20.8)  | 10.0 (16.1)            | 9.9 (19.4)   |
| Bloating           | 15.8 (20.5) | 17.3 (24.4)  | 14.8 (20.6)           | 16.5 (23.7)  | 16.2 (19.8)            | 14.2 (22.7)  |
| Dry mouth          | 24.2 (24.3) | 25.5 (23.7)  | 16.0 (21.2)           | 15.6 (18.1)  | 17.5 (23.4)            | 13.8 (19.8)  |
| Hair loss          | 14.5 (20.5) | 19.5 (23.4)  | 11.6 (19.5)           | 15.6 (22.8)  | 7.3 (18.0)             | 5.7 (15.9)   |
| Taste              | 31.2 (31.4) | 34.9 (33.5)  | 13.8 (20.5)           | 14.2 (25.6)  | 11.0 (19.0)            | 8.9 (17.7)   |
| Anxiety            | 33.6 (29.9) | 36.2 (27.6)  | 31.8 (29.9)           | 32.6 (25.9)  | 33.3 (29.1)            | 25.4 (25.3)  |

|                            |             |             |             |             |             |             |
|----------------------------|-------------|-------------|-------------|-------------|-------------|-------------|
| Weight                     | 25.2 (27.5) | 26.4 (25.5) | 28.9 (29.8) | 23.2 (26.7) | 24.4 (26.2) | 20.6 (23.5) |
| Flatulence                 | 30.1 (26.1) | 29.0 (28.7) | 29.7 (28.0) | 28.2 (26.1) | 27.3 (24.9) | 27.1 (23.3) |
| Faecal<br>incontinence     | 13.8 (17.8) | 14.7 (22.9) | 13.9 (19.7) | 15.9 (21.6) | 10.3 (16.2) | 10.6 (18.7) |
| Sore skin                  | 20.3 (25.1) | 18.3 (23.4) | 18.3 (24.3) | 16.7 (24.5) | 15.2 (23.3) | 15.9 (20.3) |
| Embarrassment              | 21.0 (30.4) | 18.9 (27.4) | 18.5 (27.4) | 15.9 (26.6) | 16.3 (23.8) | 15.9 (25.9) |
| Stoma care<br>problems     | 13.0 (20.0) | 14.2 (27.1) | 6.9 (13.7)  | 8.3 (17.7)  | 5.9 (13.1)  | 11.1 (25.6) |
| Sexual interest<br>(men)   | 25.9 (23.9) | 32.1 (27.7) | 35.6 (27.9) | 36.7 (24.8) | 39.1 (26.6) | 40.9 (25.8) |
| Impotence                  | 40.7 (40.3) | 47.1 (40.1) | 44.4 (39.2) | 46.3 (39.0) | 50.0 (38.4) | 48.1 (36.6) |
| Sexual interest<br>(women) | 17.0 (24.9) | 13.6 (23.5) | 15.2 (21.9) | 17.6 (24.5) | 18.6 (19.0) | 16.7 (25.4) |
| Dyspareunia                | 11.4 (26.0) | 13.9 (25.7) | 20.8 (33.6) | 16.1 (29.0) | 16.6 (30.0) | 12.9 (23.8) |
